# Supplementary material for: From Canals to the Coast: Dissolved Organic Matter and TraceMetal Composition in Rivers Draining Degraded TropicalPeatlands in Indonesia
Source: Copernicus journal article supplement (doi:10.5194/bg-2019-253), 2019-08-12
Supplement: Supplementary file 1 [file bg-2019-253-supplement.pdf]

1 Supplementary material to

2

3 **From Canals to the Coast: Dissolved Organic Matter and**  
4 **Trace Metal Composition in Rivers Draining Degraded**  
5 **Tropical Peatlands in Indonesia**

6

7 Laure Gandois<sup>a</sup>, Alison May Hoyt<sup>b</sup>, Stéphane Mounier<sup>c</sup>, Gaël Le Roux<sup>a</sup>, Charles Franklin  
8 Harvey<sup>b</sup>, Adrien Claustres<sup>a</sup>, Mohammed Nuriman<sup>d</sup>, Gusti Anshari<sup>d</sup>

9 <sup>a</sup> EcoLab, Université de Toulouse, CNRS, INPT, UPS, Toulouse, France

10 <sup>b</sup>Department of Civil & Environmental Engineering, Massachusetts Institute of Technology, Cambridge,  
11 MA 01239, USA

12 <sup>c</sup> PROTEE, Université de Toulon, F-83957, La Garde, France

13 <sup>d</sup> Magister of Environmental Science, and Soil Science Department, Universitas Tanjungpura (UNTAN),  
14 Pontianak, West Kalimantan Province, Indonesia

15 \*Present address: Max Planck Institute for Biogeochemistry, 07745 Jena, Germany

16

17

18

19

20

21

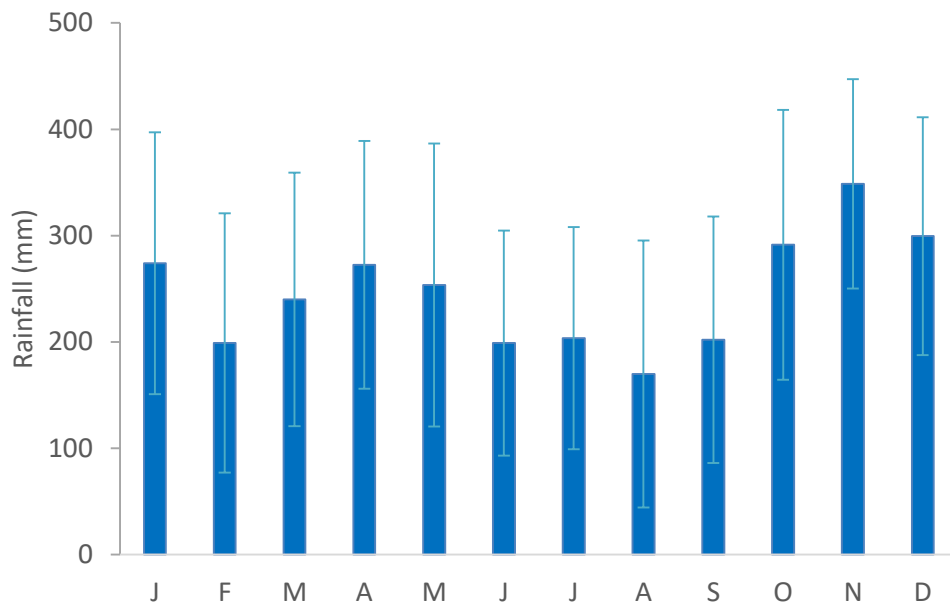

22

23 **Figure SI.1:** Mean and standard deviation of monthly rainfall amount in Pontianak (1985-2017 data). The  
 24 sampling campaigns were conducted in January (end of wetter period) and June (drier period).

25

26

27

28

29

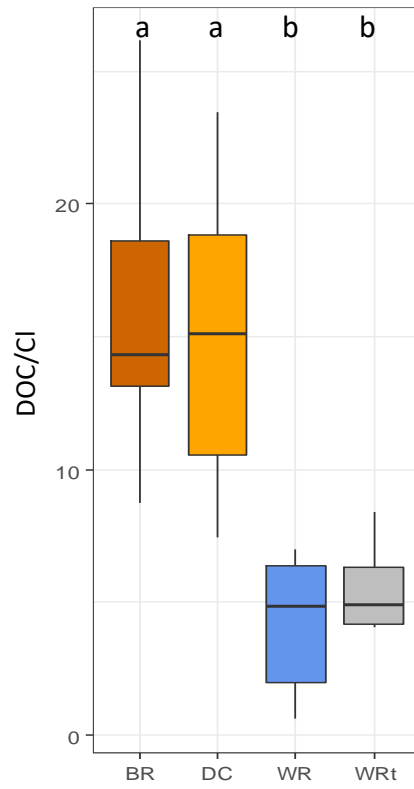

30

31 **Figure SI.2:** DOC/CI ratios for the different water types. Letters represent significantly different groups  
 32 (Kruskall Wallis and Dunn's post hoc multiple test).

33

34

35

36

37

38

39

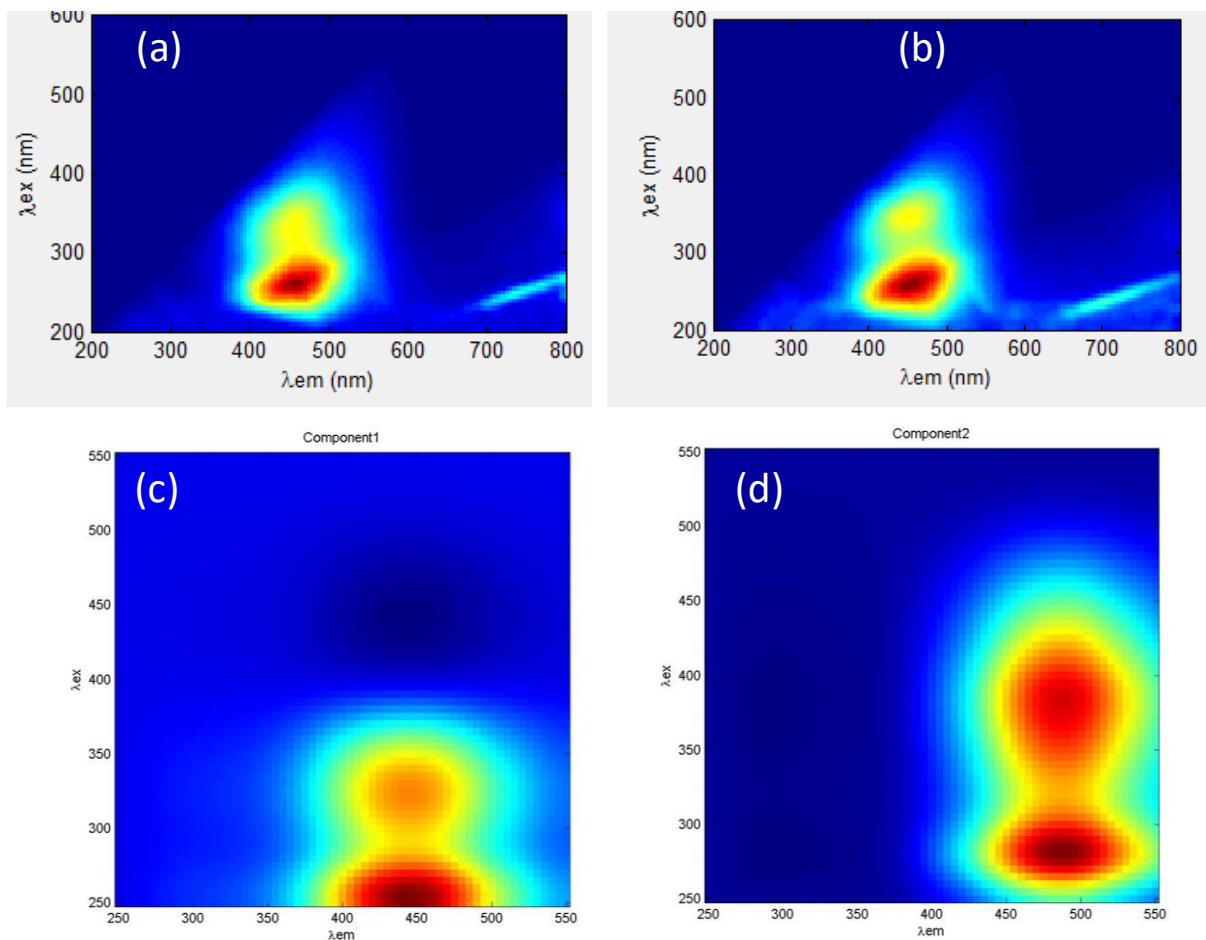

40

41 **Figure SI.3:** Typical EEMS of black river (a) and white river (b). Main fluorophores revealed by the PARAFAC  
 42 (c) C1 and (d) C2.

43

44

45

46

47

48

49

50

51

52

53

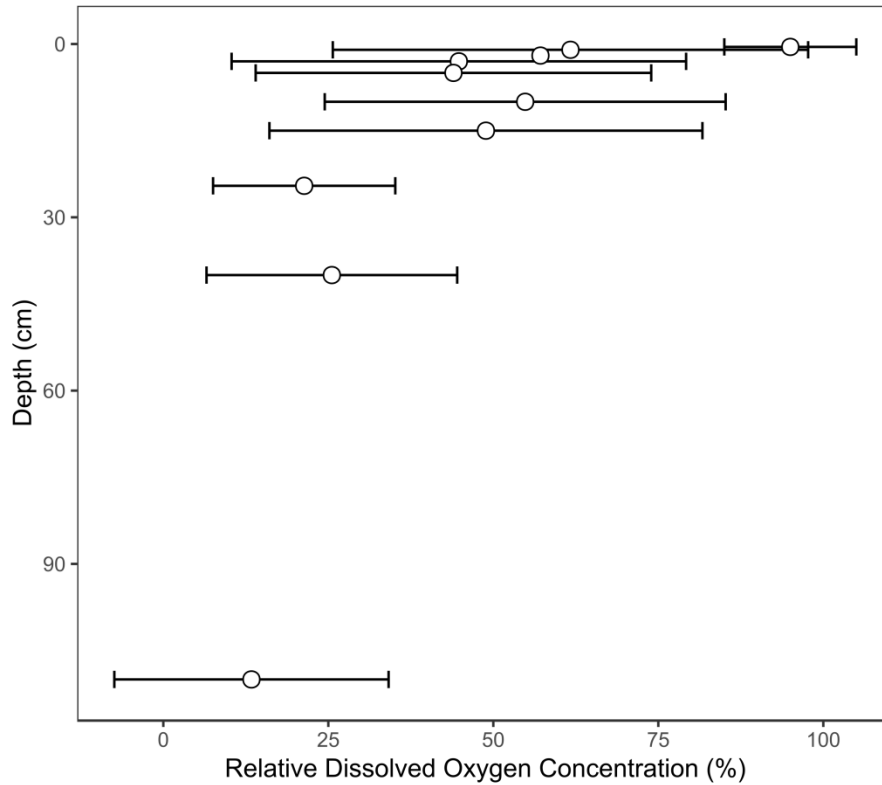

54

55 **Figure SI.4.** Relative changes in dissolved oxygen concentrations with depth in the black river. Spatial replicates  
 56 of depth profiles were measured at near the river bank, 15m from the edge of the river bank, and in the center of  
 57 the river. Mean and standard deviations are shown. Depth profiles at all locations show a sharp decrease in  
 58 dissolved oxygen with depth, indicating oxygen is consumed during the microbial processing of DOM, and  
 59 likely limits decomposition rates.

60

61
